# Supplementary material for: Mechanically Switchable Wetting Petal Effect in Self-Patterned Nanocolumnar Films on Poly(dimethylsiloxane)
Source: MDPI journal article supplement (doi:10.3390/nano11102566), 2021-09-29

## Supporting Information

# Mechanically Switchable Wetting Petal Effect in Self-Patterned Nanocolumnar Films on Poly(dimethylsiloxane)

Julian Parra-Barranco <sup>1</sup>, Carmen Lopez-Santos <sup>1,2,\*</sup>, Juan R. Sánchez-Valencia<sup>1,3</sup>, Ana Borrás <sup>1</sup>, Agustin R. Gonzalez-Elipe <sup>1</sup> and Angel Barranco <sup>1,\*</sup>

**Figure S1.** Schematic diagram of preparation process of the self-patterned nanocolumnar TiO<sub>2</sub> surfaces on PDMS foils

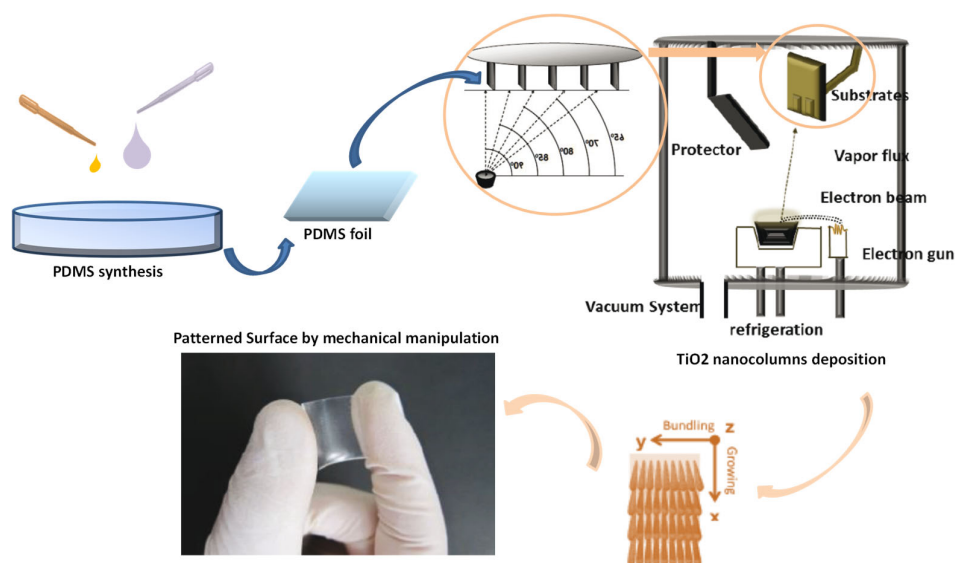

**Figure S2.** Cross section SEM micrographs of  $\text{TiO}_2$  nanocolumnar films deposited at  $60^\circ$  (a) and  $85^\circ$  (b) of zenithal angle. Scheme of the growing and bundling directions according to the GLAD geometry.

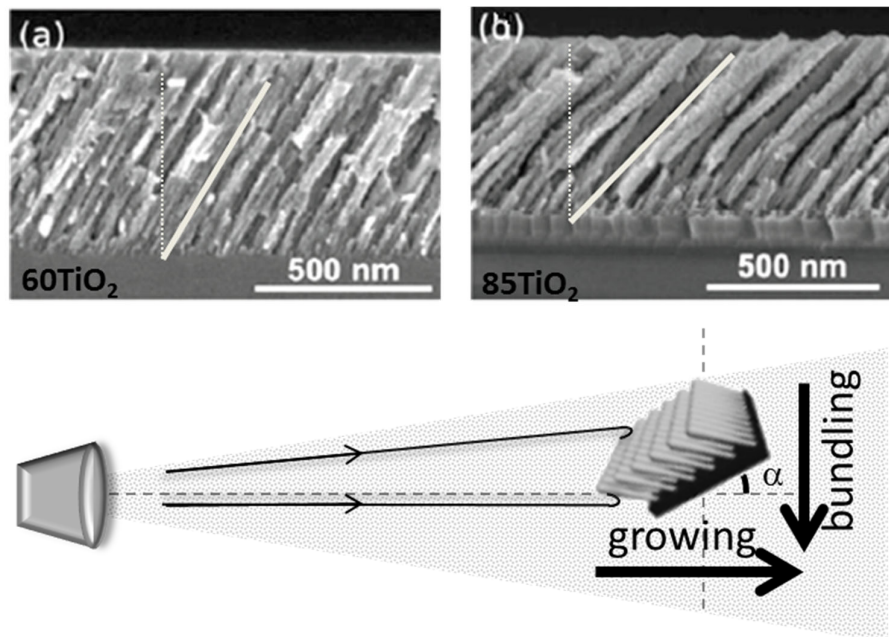

**Figure S3.** Phase contrast AFM images under convex bending and stretching to identify the microgroove region of exposed PDMS on the surface of the 85- $\text{TiO}_2$ /PDMS sample.

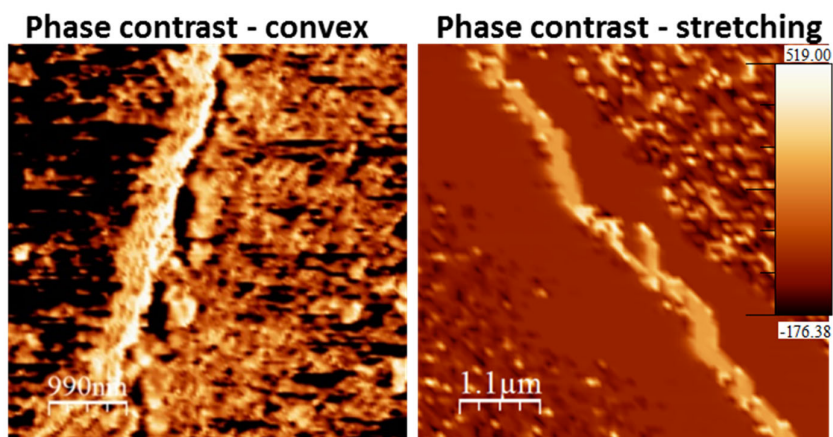

**Figure S4.** Water contact angles (WCA) and sliding angles along the parallel ( $\phi^I$ ,  $\alpha^I$ ) and normal ( $\phi^N$ ,  $\alpha^N$ ) directions of the microgrooves generated onto the nanocolumnar 60-TiO<sub>2</sub> /PDMS sample in function of the droplet volume. Corresponding values onto a reference PDMS foil for a 30 $\mu$ l water droplet are included for comparison.

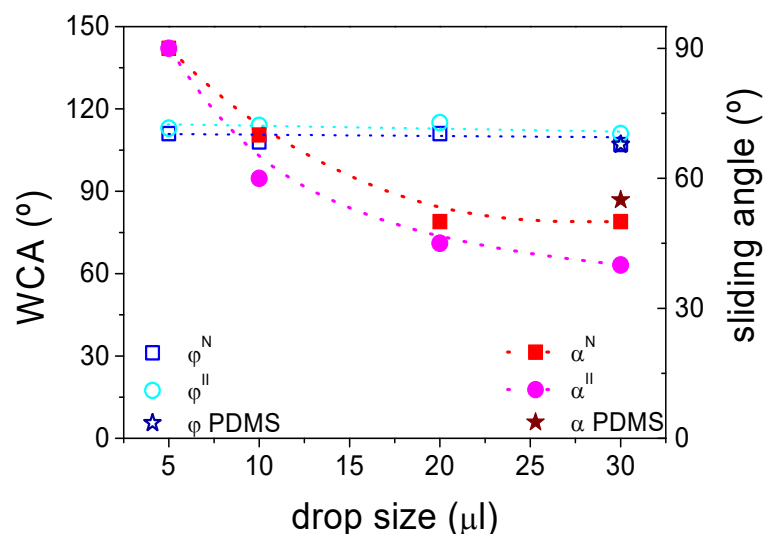

**Figure S5.** Selective water adhesion on PDMS, 60°-TiO<sub>2</sub>/PDMS and 85°-TiO<sub>2</sub>/PDMS surfaces in a convex bent configuration. Pictures report the behavior on bent configuration increasing the curvature from top to bottom in each couple of panels. Drop volume was 30  $\mu$ l.

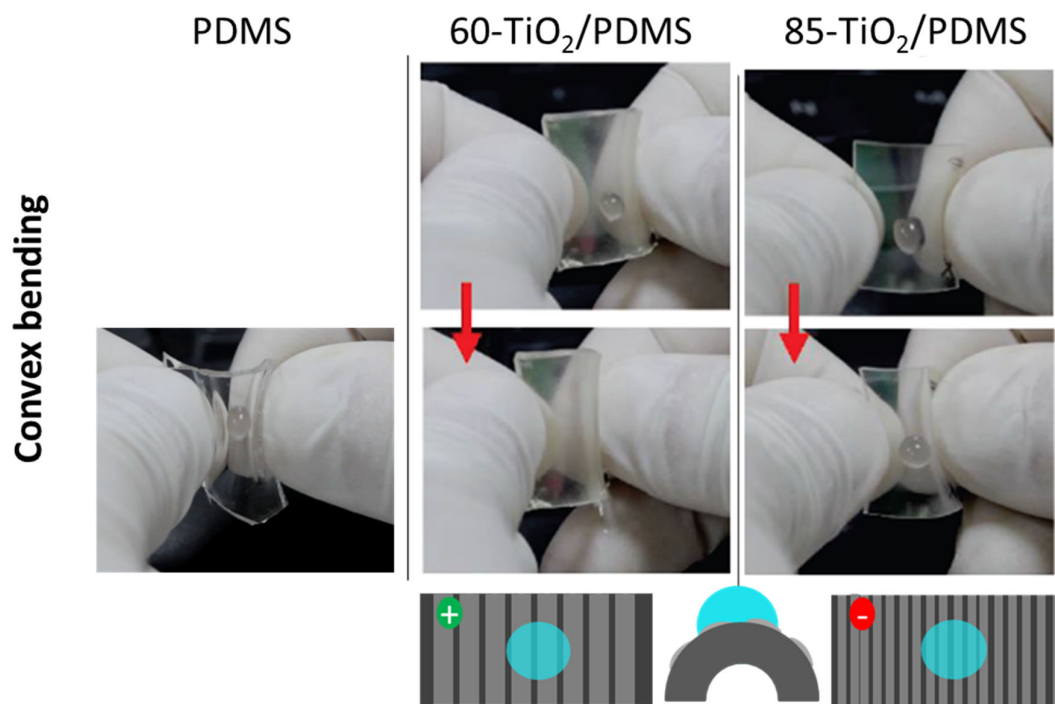

**Table S1.** Adhesion work of droplets on the different surface configurations for the TiO<sub>2</sub>/PDMS samples and on the PDMS substrate.

| Surface set-up | Water adhesion work [mN/m] |                     |                     | Diiodomethane adhesion work [mN/m] |                     |                     |
|----------------|----------------------------|---------------------|---------------------|------------------------------------|---------------------|---------------------|
|                | PDMS                       | 60-TiO <sub>2</sub> | 85-TiO <sub>2</sub> | PDMS                               | 60-TiO <sub>2</sub> | 85-TiO <sub>2</sub> |
| flat           | 76                         | 63                  | 77                  | 23                                 | 15                  | 25                  |
| concave        | 64                         | 60                  | 82                  | 15                                 | 24                  | 18                  |
| convex         | 36                         | 41                  | 75                  | 18                                 | 22                  | 18                  |
| stretched      | 41                         | 45                  | 92                  | 17                                 | 24                  | 17                  |

**Table S2.** Theoretical sliding angle  $\alpha_{th}$  for a 30 $\mu$ l water droplet from the experimental minimum ( $\phi_{min}$ ) and maximum ( $\phi_{max}$ ) contact angles values before rolling off (see image on the left). Data correspond to a flat configuration under stretching for the PDMS substrate and the 60 $^\circ$ - and 85 $^\circ$ - TiO<sub>2</sub>/PDMS surfaces.

| sample              |           | $\phi_{min}$ ( $^\circ$ ) | $\phi_{max}$ ( $^\circ$ ) | $\alpha_{th}$ ( $^\circ$ ) |
|---------------------|-----------|---------------------------|---------------------------|----------------------------|
| PDMS                | flat      | 79                        | 118                       | 36                         |
|                     | stretched | 94                        | 123                       | 27                         |
| 60-TiO <sub>2</sub> | flat      | 83                        | 126                       | 41                         |
|                     | stretched | 74                        | 96                        | 21                         |
| 85-TiO <sub>2</sub> | flat      | 90                        | 121                       | 29                         |
|                     | stretched | 60                        | 87                        | 23                         |

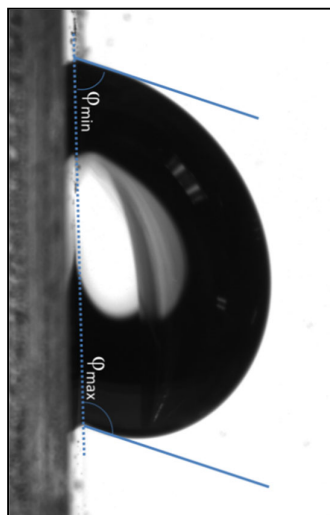

Supplement: s1 [file s1]
